# Supplementary material
Source: PubMed Central journal article supplement (PMC5843524)
Supplement: NIHMS928390-supplement-Supp_info.pdf [file NIHMS928390-supplement-Supp_info.pdf]

Supporting Table S1: Measures of NAA/Cr calculated in lobar WM and GM, thalamus and putamen using sDec, M-Int, vAvg, and vReg methods. The percent absolute differences calculated using M-Int, vAvg, and vReg methods as compared to sDec methods are also shown. Significant differences from the sDec method are shown with asterisks with FDR corrected  $p < 0.05$ ,  $p < 0.01$ , and  $p < 0.001$  denoted by \*, \*\*, and \*\*\*, respectively.

| <b>WM</b>     | <b>NAA/Cr (Mean <math>\pm</math> Std. Dev.)</b> |                   |                   |                   | <b>% Absolute Difference from sDec</b> |             |             |
|---------------|-------------------------------------------------|-------------------|-------------------|-------------------|----------------------------------------|-------------|-------------|
| <u>Region</u> | <u>sDec</u>                                     | <u>M-Int</u>      | <u>vAvg</u>       | <u>vReg</u>       | <u>M-Int</u>                           | <u>vAvg</u> | <u>vReg</u> |
| RF            | 1.635 $\pm$ 0.146                               | 1.62 $\pm$ 0.141  | 1.67 $\pm$ 0.15   | 1.66 $\pm$ 0.149  | 0.958                                  | 2.141       | 1.518       |
| LF            | 1.628 $\pm$ 0.143                               | 1.618 $\pm$ 0.142 | 1.676 $\pm$ 0.154 | 1.663 $\pm$ 0.15  | 0.592                                  | 2.952 (*)   | 2.182       |
| RT            | 1.658 $\pm$ 0.17                                | 1.647 $\pm$ 0.162 | 1.674 $\pm$ 0.162 | 1.665 $\pm$ 0.187 | 0.662                                  | 0.979       | 0.430       |
| LT            | 1.662 $\pm$ 0.16                                | 1.654 $\pm$ 0.164 | 1.688 $\pm$ 0.167 | 1.682 $\pm$ 0.19  | 0.455                                  | 1.570       | 1.211       |
| RP            | 1.676 $\pm$ 0.153                               | 1.665 $\pm$ 0.15  | 1.707 $\pm$ 0.163 | 1.722 $\pm$ 0.17  | 0.670                                  | 1.845       | 2.762 (*)   |
| LP            | 1.686 $\pm$ 0.151                               | 1.677 $\pm$ 0.15  | 1.708 $\pm$ 0.161 | 1.722 $\pm$ 0.169 | 0.518                                  | 1.308       | 2.135       |
| RO            | 1.611 $\pm$ 0.181                               | 1.602 $\pm$ 0.16  | 1.648 $\pm$ 0.154 | 1.645 $\pm$ 0.189 | 0.552                                  | 2.279       | 2.112       |
| LO            | 1.628 $\pm$ 0.178                               | 1.6 $\pm$ 0.158   | 1.641 $\pm$ 0.153 | 1.678 $\pm$ 0.202 | 1.741                                  | 0.773       | 3.056       |
| C             | 1.162 $\pm$ 0.263                               | 1.198 $\pm$ 0.239 | 1.263 $\pm$ 0.251 | 1.161 $\pm$ 0.296 | 3.136                                  | 8.696 (***) | 0.100       |

  

| <b>GM</b>     | <b>NAA/Cr (Mean <math>\pm</math> Std. Dev.)</b> |                   |                   |                   | <b>% Absolute Difference from sDec</b> |              |              |
|---------------|-------------------------------------------------|-------------------|-------------------|-------------------|----------------------------------------|--------------|--------------|
| <u>Region</u> | <u>sDec</u>                                     | <u>M-Int</u>      | <u>vAvg</u>       | <u>vReg</u>       | <u>M-Int</u>                           | <u>vAvg</u>  | <u>vReg</u>  |
| RF            | 1.309 $\pm$ 0.117                               | 1.41 $\pm$ 0.15   | 1.398 $\pm$ 0.143 | 1.331 $\pm$ 0.133 | 7.668 (***)                            | 6.772 (***)  | 1.704        |
| LF            | 1.322 $\pm$ 0.123                               | 1.398 $\pm$ 0.161 | 1.435 $\pm$ 0.146 | 1.436 $\pm$ 0.152 | 5.785 (***)                            | 8.598 (***)  | 8.651 (***)  |
| RT            | 1.335 $\pm$ 0.132                               | 1.326 $\pm$ 0.213 | 1.337 $\pm$ 0.201 | 1.113 $\pm$ 0.136 | 0.686                                  | 0.141        | 16.615 (***) |
| LT            | 1.269 $\pm$ 0.129                               | 1.304 $\pm$ 0.236 | 1.338 $\pm$ 0.217 | 1.285 $\pm$ 0.128 | 2.717                                  | 5.377 (***)  | 1.234        |
| RP            | 1.352 $\pm$ 0.118                               | 1.513 $\pm$ 0.127 | 1.466 $\pm$ 0.127 | 1.28 $\pm$ 0.146  | 11.905 (***)                           | 8.389 (***)  | 5.305 (***)  |
| LP            | 1.325 $\pm$ 0.123                               | 1.507 $\pm$ 0.137 | 1.474 $\pm$ 0.142 | 1.351 $\pm$ 0.118 | 13.747 (***)                           | 11.255 (***) | 1.915 (*)    |
| RO            | 1.356 $\pm$ 0.152                               | 1.52 $\pm$ 0.117  | 1.513 $\pm$ 0.172 | 1.243 $\pm$ 0.177 | 12.084 (***)                           | 11.599 (***) | 8.324 (***)  |
| LO            | 1.3 $\pm$ 0.149                                 | 1.469 $\pm$ 0.182 | 1.442 $\pm$ 0.154 | 1.256 $\pm$ 0.168 | 12.952 (***)                           | 10.884 (***) | 3.431 (**)   |
| C             | 0.925 $\pm$ 0.178                               | 0.969 $\pm$ 0.139 | 0.918 $\pm$ 0.178 | 0.775 $\pm$ 0.13  | 4.787 (**)                             | 0.708        | 16.222 (***) |

  

|               | <b>NAA/Cr (Mean <math>\pm</math> Std. Dev.)</b> |                   |                   |                   | <b>% Absolute Difference from sDec</b> |             |             |
|---------------|-------------------------------------------------|-------------------|-------------------|-------------------|----------------------------------------|-------------|-------------|
| <u>Region</u> | <u>sDec</u>                                     | <u>M-Int</u>      | <u>vAvg</u>       |                   | <u>M-Int</u>                           | <u>vAvg</u> | <u>vReg</u> |
| Thalamus      | 1.474 $\pm$ 0.159                               | 1.488 $\pm$ 0.152 | 1.517 $\pm$ 0.165 | 1.516 $\pm$ 0.155 | 0.960                                  | 2.939 (*)   | 2.862 (**)  |
| Putamen       | 1.415 $\pm$ 0.132                               | 1.43 $\pm$ 0.127  | 1.461 $\pm$ 0.134 | 1.46 $\pm$ 0.135  | 1.066                                  | 3.223 (**)  | 3.141       |

Supporting Table S2. Regression equations for associations of NAA/Cr and Cho/Cr with Age in WM regions.

| WM Region        | Regression Equation for NAA/Cr | R <sup>2</sup> | FDR<br>p-value | Regression Equation for Cho/Cr | R <sup>2</sup> | FDR<br>p-value |
|------------------|--------------------------------|----------------|----------------|--------------------------------|----------------|----------------|
| Cerebellum       | NAA/Cr = 1.277 - 0.0031 * Age  | 0.02           | 0.040          | Cho/Cr = 0.278 + 0 * Age       | 0.01           | 0.982          |
| L Frontal Lobe   | NAA/Cr = 1.853 - 0.0058 * Age  | 0.32           | < 0.001        | Cho/Cr = 0.274 + 0.0008 * Age  | 0.12           | < 0.001        |
| L Occipital Lobe | NAA/Cr = 1.908 - 0.0074 * Age  | 0.34           | < 0.001        | Cho/Cr = 0.202 + 0.0004 * Age  | 0.02           | 0.037          |
| L Parietal Lobe  | NAA/Cr = 1.933 - 0.0066 * Age  | 0.38           | < 0.001        | Cho/Cr = 0.265 + 0.0004 * Age  | 0.04           | 0.007          |
| L Temporal Lobe  | NAA/Cr = 1.889 - 0.0061 * Age  | 0.29           | < 0.001        | Cho/Cr = 0.269 + 0.0005 * Age  | 0.05           | 0.003          |
| R Frontal Lobe   | NAA/Cr = 1.842 - 0.0057 * Age  | 0.32           | < 0.001        | Cho/Cr = 0.268 + 0.0008 * Age  | 0.13           | < 0.001        |
| R Occipital Lobe | NAA/Cr = 1.891 - 0.0075 * Age  | 0.34           | < 0.001        | Cho/Cr = 0.200 + 0.0004 * Age  | 0.03           | 0.018          |
| R Parietal Lobe  | NAA/Cr = 1.933 - 0.0068 * Age  | 0.40           | < 0.001        | Cho/Cr = 0.266 + 0.0005 * Age  | 0.05           | 0.002          |
| R Temporal Lobe  | NAA/Cr = 1.901 - 0.0065 * Age  | 0.29           | < 0.001        | Cho/Cr = 0.289 + 0.0005 * Age  | 0.05           | 0.003          |
| Whole Brain      | NAA/Cr = 1.836 - 0.0060 * Age  | 0.18           | < 0.001        | Cho/Cr = 0.257 + 0.0005 * Age  | 0.02           | 0.042          |

Supporting Table S3. Regression equations for associations of NAA/Cr and Cho/Cr with Age in GM regions.

| GM Region        | Regression Equation for NAA/Cr | R <sup>2</sup> | FDR<br>p-value | Regression Equation for Cho/Cr | R <sup>2</sup> | FDR<br>p-value |
|------------------|--------------------------------|----------------|----------------|--------------------------------|----------------|----------------|
| Cerebellum       | NAA/Cr = 1.068 - 0.0038 * Age  | 0.08           | < 0.001        | Cho/Cr = 0.185 - 0.0002 * Age  | 0.00           | 0.306          |
| L Frontal Lobe   | NAA/Cr = 1.494 - 0.0049 * Age  | 0.36           | < 0.001        | Cho/Cr = 0.200 - 0.0001 * Age  | 0.00           | 0.605          |
| L Occipital Lobe | NAA/Cr = 1.434 - 0.0036 * Age  | 0.11           | < 0.001        | Cho/Cr = 0.142 - 0.0002 * Age  | 0.01           | 0.132          |
| L Parietal Lobe  | NAA/Cr = 1.493 - 0.0045 * Age  | 0.27           | < 0.001        | Cho/Cr = 0.134 + 0.0001 * Age  | 0.00           | 0.447          |
| L Temporal Lobe  | NAA/Cr = 1.427 - 0.0042 * Age  | 0.21           | < 0.001        | Cho/Cr = 0.170 - 0.0003 * Age  | 0.01           | 0.097          |
| R Frontal Lobe   | NAA/Cr = 1.504 - 0.0049 * Age  | 0.32           | < 0.001        | Cho/Cr = 0.193 + 0 * Age       | 0.01           | 0.982          |
| R Occipital Lobe | NAA/Cr = 1.480 - 0.0033 * Age  | 0.09           | < 0.001        | Cho/Cr = 0.131 - 0.0002 * Age  | 0.01           | 0.109          |
| R Parietal Lobe  | NAA/Cr = 1.520 - 0.0045 * Age  | 0.29           | < 0.001        | Cho/Cr = 0.134 + 0 * Age       | 0.01           | 0.911          |
| R Temporal Lobe  | NAA/Cr = 1.483 - 0.0040 * Age  | 0.18           | < 0.001        | Cho/Cr = 0.167 - 0.0001 * Age  | 0.00           | 0.399          |
| Whole Brain      | NAA/Cr = 1.433 - 0.0042 * Age  | 0.10           | < 0.001        | Cho/Cr = 0.162 - 0.0001 * Age  | 0.00           | 0.115          |

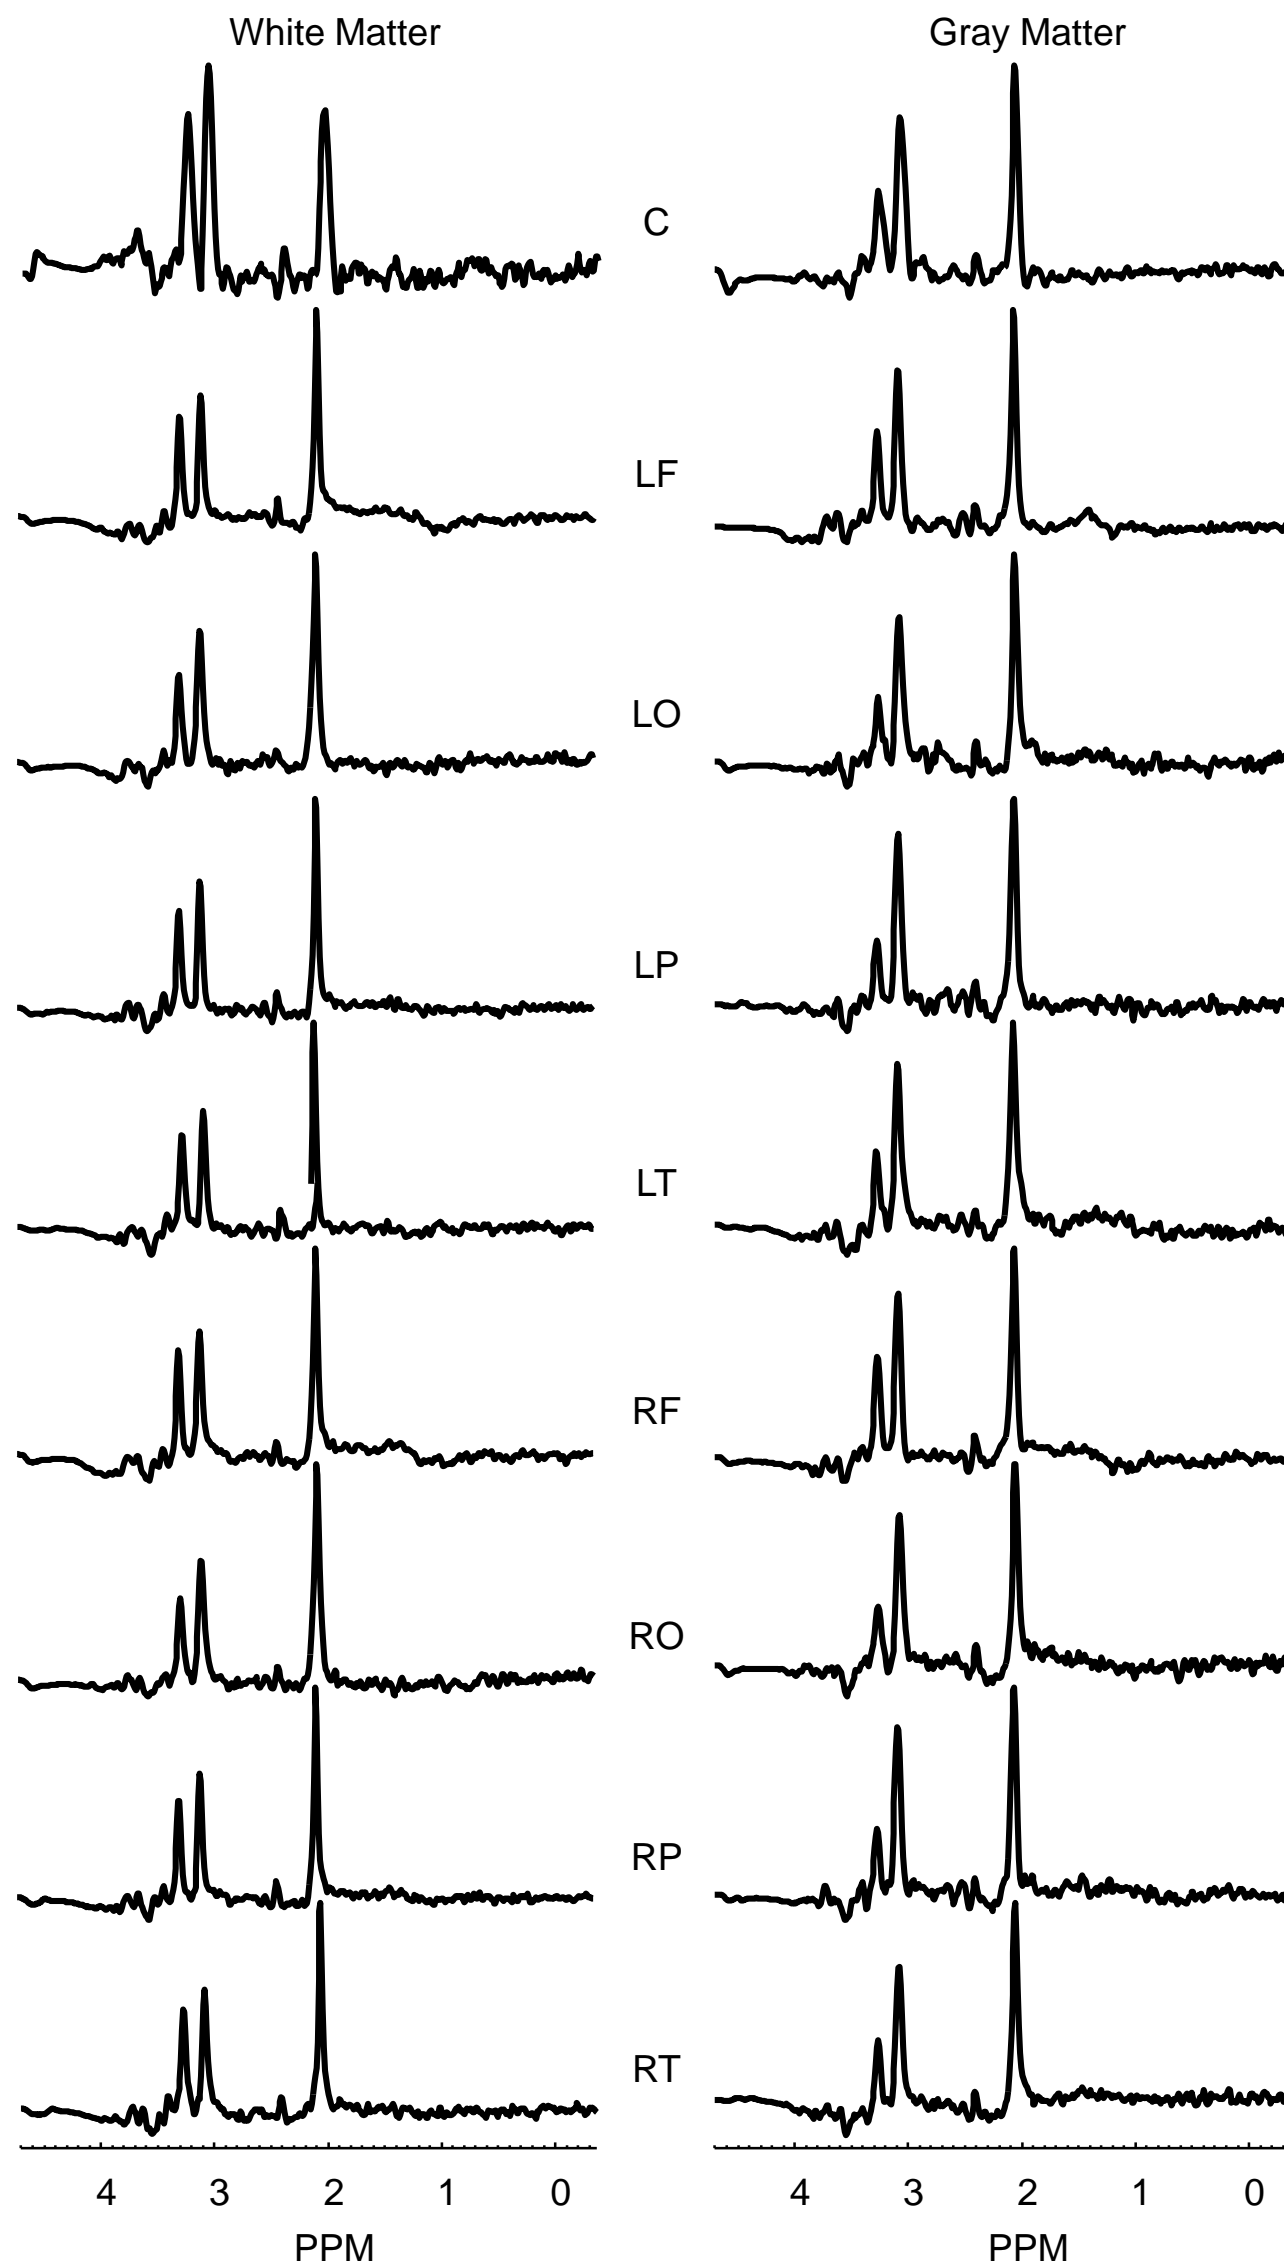

Supporting Figure S1: The sDec derived WM and GM spectra for an individual from all studied lobar regions. Results are shown for the right and left frontal (RF and LF), temporal (RT and LT), parietal (RP and LP), and occipital (RO and LO) lobes, and the cerebellum (C).
